# Supplementary material for: Genome assembly of Klebsiella michiganensis based on metagenomic next-generation sequencing reveals its genomic characteristics in population genetics and molecular epidemiology
Source: Front Microbiol. 2025 Apr 24;16:1546594. doi: 10.3389/fmicb.2025.1546594 (PMC12058774; doi:10.3389/fmicb.2025.1546594)
Supplement: Supplementary Table 1 — Results of MetaML ST of BALF metagenomes. [file Table_1.xlsx]

## Sheet: Table S1
ST	gapA	infB	mdh	pgi	phoE	rpoB	tonB
1	1	1	1	1	1	1	1
2	1	2	2	1	2	1	2
3	2	3	2	2	3	1	3
4	2	2	2	3	4	2	2
5	2	2	2	3	5	2	2
9	1	7	2	1	9	1	2
10	3	8	6	7	10	6	7
11	3	5	7	8	11	6	5
12	3	4	3	4	12	3	4
13	3	9	8	9	13	6	8
14	4	6	9	10	4	7	9
15	4	6	5	10	8	5	6
16	5	10	10	10	14	5	9
17	4	6	11	10	15	8	9
18	1	2	2	3	2	1	2
19	1	2	2	1	16	1	2
20	1	11	12	1	4	9	1
21	1	12	2	1	2	1	1
22	1	3	13	1	2	10	10
23	4	6	5	6	15	7	6
24	4	6	14	11	15	11	9
26	3	5	4	13	17	4	5
27	3	5	7	13	17	4	5
28	3	5	7	8	11	12	5
29	3	4	15	8	18	6	11
30	1	2	2	14	19	9	2
31	1	13	1	15	4	1	1
32	3	8	16	16	20	6	12
33	1	7	1	1	2	1	1
34	2	2	2	17	2	1	2
35	3	8	17	7	20	6	13
36	1	7	2	15	21	1	14
37	1	7	1	18	4	13	15
38	5	6	18	10	15	8	16
39	6	6	19	6	22	7	17
40	3	8	20	7	23	14	18
41	3	9	8	9	20	15	8
42	3	5	21	19	24	16	19
43	3	5	21	20	11	6	20
44	3	14	22	21	25	17	21
45	3	15	15	22	18	3	4
46	1	7	2	15	2	1	1
47	7	16	23	23	26	18	22
48	1	3	13	24	27	10	1
49	3	8	24	25	28	6	23
50	3	8	8	7	10	6	7
51	1	7	2	1	2	1	1
52	8	8	16	21	20	19	12
53	1	7	2	14	19	9	2
55	3	9	16	21	23	19	25
56	2	18	2	17	30	2	1
57	1	7	2	2	9	1	2
58	1	2	2	1	4	1	2
59	2	2	2	27	2	1	2
60	5	6	19	10	31	7	26
61	1	2	2	28	16	1	2
62	4	6	26	10	15	5	6
63	1	2	2	1	9	1	2
64	10	8	27	29	32	6	27
65	1	7	2	30	4	21	2
66	3	4	15	4	33	22	28
67	11	19	2	2	34	1	2
68	12	8	17	21	20	17	29
69	5	6	18	10	15	23	9
70	3	20	28	29	35	19	30
71	5	6	19	10	36	5	6
72	4	6	19	6	15	24	31
73	5	6	19	10	37	5	6
74	5	6	19	11	15	7	32
75	4	6	19	10	15	5	6
76	6	6	14	10	15	8	33
77	3	21	15	8	12	6	4
78	1	22	2	27	9	1	2
79	12	9	17	7	20	6	25
80	3	4	15	8	12	3	4
81	13	23	29	31	38	25	34
82	14	24	15	8	18	6	4
83	3	4	30	8	39	26	35
84	3	8	17	21	40	17	29
85	3	5	21	13	24	6	19
86	3	4	15	32	41	3	35
87	1	7	1	15	4	13	15
88	3	8	24	33	20	6	23
89	15	6	14	10	14	8	9
90	1	25	2	34	42	1	36
91	3	4	15	8	12	3	35
92	3	4	15	8	18	6	37
93	3	26	31	8	33	6	4
94	3	4	15	8	12	6	11
95	3	24	15	4	43	6	4
96	2	19	2	18	34	10	1
97	5	6	26	35	15	7	9
98	3	27	32	21	44	19	38
99	6	6	19	35	15	7	9
100	2	2	33	18	2	1	39
101	2	3	2	2	45	10	1
102	3	4	15	36	33	3	4
103	3	5	34	13	17	4	5
104	4	6	11	10	46	27	9
105	16	28	35	37	47	28	40
106	1	3	36	18	2	10	1
107	3	29	17	7	20	6	41
108	3	5	21	20	24	6	30
109	3	9	8	9	20	6	8
110	3	15	15	38	12	29	4
111	1	7	2	30	2	2	1
112	2	3	2	27	16	1	42
113	17	23	23	39	48	30	43
114	3	9	16	40	49	17	44
115	17	16	37	41	50	25	43
116	3	8	20	21	25	17	45
117	5	6	14	11	14	7	6
118	18	8	17	21	20	31	29
119	19	6	19	10	31	5	31
120	1	30	12	14	4	1	1
121	17	16	38	39	14	25	43
122	5	10	10	10	14	5	19
123	19	6	39	10	15	5	8
124	7	23	38	23	12	25	4
125	4	6	19	35	37	7	16
126	5	6	19	10	15	5	9
127	14	4	15	4	41	3	4
128	3	31	40	21	20	6	46
129	6	6	19	10	15	7	17
130	3	8	17	42	20	6	23
131	3	8	41	43	51	6	47
132	6	6	26	10	20	24	33
133	17	32	29	44	15	25	9
134	5	6	14	10	52	7	31
135	3	8	17	45	20	6	48
136	5	6	39	11	15	7	6
137	3	4	42	8	25	3	4
138	3	8	24	46	53	32	48
139	3	8	24	46	54	32	48
140	3	8	24	46	55	32	48
141	1	7	2	1	4	1	2
142	3	5	40	13	24	4	49
143	3	8	43	7	20	33	23
144	3	5	21	20	24	6	20
145	1	3	2	34	16	34	1
146	3	5	44	13	24	6	50
147	2	19	2	14	34	10	1
148	3	5	44	13	24	35	50
149	3	33	17	45	20	6	48
150	1	2	2	14	4	9	2
151	3	5	21	13	20	6	12
152	2	3	2	27	16	1	2
153	1	2	1	1	1	1	1
154	1	7	2	47	4	1	2
155	1	2	2	28	56	1	2
156	2	2	2	1	57	1	2
157	3	34	45	48	20	17	47
158	3	8	17	45	20	6	12
159	1	7	2	30	2	21	2
160	13	23	29	31	58	25	34
161	2	2	2	1	4	2	2
162	3	24	31	8	18	6	4
163	7	23	29	31	59	25	43
164	4	6	14	11	60	11	9
165	20	35	46	49	61	36	51
166	2	19	2	14	45	1	52
167	12	8	20	21	10	32	53
168	15	6	39	10	46	24	6
169	4	6	26	10	62	5	9
170	3	8	17	42	40	6	23
171	3	4	15	4	18	3	4
172	6	6	19	11	46	7	9
173	15	6	19	11	63	5	31
174	7	23	29	31	64	25	43
175	3	21	15	8	12	6	20
176	1	7	2	1	65	1	2
177	3	8	17	21	40	17	54
178	1	11	2	1	4	1	2
179	1	36	2	1	66	2	2
180	3	8	22	42	20	33	23
181	1	7	2	1	67	1	2
182	3	37	20	7	23	14	18
183	3	4	47	8	43	3	4
184	4	6	26	10	46	5	6
185	7	23	23	31	68	25	43
186	21	6	14	10	62	7	9
187	7	23	38	31	69	37	22
188	1	38	48	1	65	1	2
189	5	10	10	10	70	5	9
190	5	6	5	50	71	5	6
191	3	4	49	8	25	38	55
192	3	9	17	21	20	6	5
193	7	23	29	31	72	25	34
194	12	29	20	51	40	6	46
195	3	8	20	21	25	17	56
196	3	14	50	21	25	17	21
197	3	4	15	8	33	6	4
198	8	8	16	52	73	19	12
199	2	2	2	3	19	2	2
200	2	7	2	15	2	1	57
201	1	3	12	53	16	1	1
202	3	5	21	13	74	6	12
203	3	39	8	7	20	6	38
204	3	4	49	4	25	3	4
205	12	9	17	9	20	17	29
206	3	40	7	54	75	39	20
207	1	3	13	24	2	10	58
208	5	6	18	10	76	7	9
209	22	19	2	18	34	10	1
210	3	4	51	8	77	6	59
211	3	8	52	42	20	33	23
212	3	41	53	21	78	6	60
213	3	5	21	13	24	6	61
214	5	6	19	10	46	5	9
215	21	6	14	10	46	11	6
216	4	6	19	10	46	24	31
217	3	9	16	13	20	6	27
218	5	6	19	35	46	7	9
219	2	2	2	1	19	2	2
220	3	8	24	21	40	6	12
221	1	11	2	1	2	40	2
222	23	42	2	14	34	41	62
223	2	18	2	55	79	1	2
224	24	6	54	10	46	5	16
225	4	6	26	10	80	7	63
226	3	9	55	21	81	6	64
227	21	6	56	10	46	11	6
228	5	6	57	10	70	5	6
229	7	23	58	31	82	25	22
230	25	23	38	31	82	25	65
231	3	9	20	21	25	17	56
232	3	4	49	8	25	3	4
233	3	4	15	8	41	3	28
234	26	41	40	21	83	6	25
235	1	3	12	53	16	1	66
236	27	6	14	11	46	5	9
237	1	13	1	56	4	1	1
238	4	6	57	10	46	8	6
239	3	29	32	29	10	6	67
240	1	18	2	14	2	1	1
241	1	18	2	1	84	1	2
242	3	4	15	8	41	3	4
243	1	7	1	2	19	1	1
244	1	7	2	18	19	1	2
245	2	7	2	14	19	1	2
246	5	10	59	10	46	7	9
247	2	2	33	57	85	1	1
248	5	6	19	10	86	7	26
249	7	23	38	31	87	25	22
250	1	2	2	1	88	1	2
251	4	43	39	11	46	5	9
252	1	7	2	15	89	1	1
253	3	5	21	58	11	6	12
254	3	5	7	42	11	33	68
255	5	6	19	10	70	24	69
256	4	6	19	10	46	42	70
257	1	3	13	24	2	10	10
258	2	7	2	15	2	1	1
259	3	40	7	13	75	4	20
260	3	9	40	21	20	6	46
261	4	6	19	10	46	5	6
262	6	6	19	35	46	7	9
263	6	6	26	10	46	24	33
264	5	10	19	10	46	8	9
265	28	5	60	13	24	33	12
266	1	2	2	1	65	1	2
267	1	7	2	1	66	1	2
268	3	15	15	4	41	3	71
269	5	5	21	58	24	6	20
270	7	23	38	31	69	25	22
271	1	18	2	1	4	1	2
272	31	25	48	10	60	24	48
273	8	25	48	10	60	24	48
274	8	25	35	10	60	24	48
275	8	25	48	10	60	24	43
276	8	25	48	10	60	44	44
277	7	23	38	39	6	25	43
278	1	2	2	60	91	1	76
279	1	36	2	1	66	1	2
280	1	3	13	24	2	21	75
281	3	5	60	8	11	6	5
282	2	19	2	14	29	1	52
283	5	6	19	11	46	7	32
284	3	9	17	21	83	31	23
285	1	3	13	24	2	10	1
286	2	2	33	14	16	1	39
287	1	2	2	2	94	1	1
288	1	2	2	28	66	1	2
289	1	2	2	27	65	1	1
290	5	6	14	11	70	7	6
291	5	6	66	10	95	5	9
292	1	2	2	14	4	1	2
293	1	2	2	1	90	2	2
294	3	8	24	33	20	6	25
295	12	41	25	9	24	6	12
296	1	7	2	5	34	1	1
297	3	5	21	13	24	6	74
298	7	46	58	31	82	18	22
299	2	7	2	18	19	1	2
300	13	23	38	39	69	25	22
301	5	6	19	10	46	7	32
302	1	18	2	1	84	1	1
303	12	29	20	21	40	32	46
304	3	8	22	52	20	33	24
305	3	41	25	12	20	6	25
306	3	8	22	52	20	33	23
307	19	6	39	10	46	5	9
308	3	14	8	21	25	17	21
309	3	5	21	13	24	33	20
310	3	26	31	8	33	6	72
311	17	32	29	44	92	25	77
312	5	6	26	10	15	7	9
313	4	6	19	10	15	7	6
314	3	8	20	25	23	14	18
315	3	41	21	13	24	6	20
316	5	6	19	11	46	5	9
317	3	8	22	9	20	33	23
318	3	5	8	8	11	6	5
319	4	6	14	11	46	11	9
320	17	16	38	39	82	25	43
321	7	16	38	31	26	25	65
322	17	23	38	39	26	25	22
323	1	3	2	14	4	1	2
324	32	5	7	61	24	6	78
325	1	7	67	1	4	1	2
326	4	6	14	35	96	5	6
327	4	6	68	11	46	5	79
328	1	3	13	24	97	10	80
329	1	48	2	1	2	1	2
330	3	4	15	4	33	45	4
331	19	6	19	10	15	6	81
332	3	6	15	10	15	8	33
333	4	23	8	27	25	25	22
334	1	22	2	23	9	1	2
335	7	6	39	10	50	24	31
336	6	5	21	10	24	6	19
337	3	9	8	9	12	15	8
338	12	9	17	7	15	6	25
339	3	4	26	8	12	3	4
340	1	17	2	27	2	1	2
341	21	6	70	10	46	11	6
342	3	5	40	64	24	6	82
343	3	5	21	65	20	6	12
344	3	8	24	21	24	32	48
345	2	2	33	14	2	1	2
346	1	7	1	15	89	1	83
347	1	36	2	1	101	1	2
348	34	2	2	3	19	2	2
349	3	50	15	8	41	22	4
350	4	6	11	10	46	8	9
351	7	23	23	39	69	25	43
352	1	7	2	14	2	1	2
353	3	14	22	21	20	17	21
354	3	5	21	58	24	6	20
355	1	11	2	1	2	1	2
356	3	4	15	4	33	3	28
357	1	2	2	15	4	1	1
358	1	7	2	15	89	1	2
359	1	7	2	66	89	1	2
360	3	29	8	21	20	6	48
361	6	6	14	10	46	8	33
362	5	6	26	35	46	7	9
363	3	40	7	54	75	4	20
364	1	7	2	2	65	1	2
365	2	7	2	1	89	1	1
366	3	8	17	21	51	6	23
367	3	9	17	21	10	17	29
368	3	8	17	21	40	17	46
369	1	3	2	1	66	1	86
370	3	29	74	21	20	31	12
371	15	6	19	10	46	24	6
372	3	8	22	67	102	32	87
373	3	9	17	21	40	17	29
374	38	4	30	8	39	26	35
375	37	18	2	17	30	1	2
376	3	8	24	42	106	6	88
377	4	6	19	10	46	8	31
378	19	6	18	10	46	5	16
379	15	6	19	10	46	7	90
380	3	41	76	29	51	6	45
381	26	41	40	21	20	6	25
382	3	29	17	7	107	6	89
383	3	4	75	4	25	3	28
384	3	8	17	21	106	31	13
385	3	9	45	21	20	6	46
386	7	16	58	68	26	25	43
387	17	52	38	31	6	25	91
388	1	7	2	2	2	1	1
389	6	6	77	10	46	8	33
390	1	53	2	1	2	1	2
391	5	54	14	11	46	5	6
392	3	9	20	9	83	6	45
393	3	8	20	7	20	14	18
394	19	6	39	10	46	5	81
395	2	2	33	18	88	1	39
396	1	17	1	15	89	1	83
397	1	3	13	1	2	10	1
398	3	9	25	7	20	6	54
399	1	7	2	1	65	2	2
400	21	6	19	10	46	11	6
401	1	3	2	1	30	1	2
402	7	23	38	44	26	25	65
403	3	8	76	21	51	19	25
404	5	6	19	10	46	7	6
405	3	8	24	33	106	6	23
406	5	6	19	10	46	5	6
407	3	5	21	13	25	6	61
408	21	6	19	10	46	7	9
100001	3	8	16	21	107	19	100001
