# Supplementary material for: Genome assembly of Klebsiella michiganensis based on metagenomic next-generation sequencing reveals its genomic characteristics in population genetics and molecular epidemiology
Source: Front Microbiol. 2025 Apr 24;16:1546594. doi: 10.3389/fmicb.2025.1546594 (PMC12058774; doi:10.3389/fmicb.2025.1546594)
Supplement: Supplementary Table 2 — Pairwise average nucleotide identity (ANI) values between genomes of distinct Klebsiella species. [file Table_2.xlsx]

## Sheet: Table S2
	Species	K.michiganensis	K.aerogenes	K.oxytoca	K.grimontii	K.michiganensis	K.pneumoniae	K.pneumoniae	K.oxytoca	K.grimontii	K.quasipneumoniae	K.quasipneumoniae	K.pneumoniae	K.michiganensis	K.aerogenes	K.grimontii	K.quasipneumoniae
Species	Genome	KMLRT2206	GCF_000956775	GCF_001053715	GCF_004343645	GCF_014217275	GCF_000735285	GCF_000364385	GCF_001022295	GCF_004104525	GCF_000827665	GCF_001280925	GCF_000722485	GCF_017639895	GCF_000957275	GCF_003261555	GCF_001278905
K.aerogenes	GCF_000956775	0.833533	1	0.830035	0.833357	0.833074	0.848785	0.849712	0.830231	0.834104	0.848016	0.847996	0.849986	0.833009	0.986022	0.834872	0.847989
K.oxytoca	GCF_001053715	0.92171	0.829646	1	0.912154	0.922549	0.832364	0.835027	0.993741	0.913338	0.832822	0.832966	0.832854	0.922617	0.829037	0.913671	0.832973
K.grimontii	GCF_004343645	0.93644	0.833293	0.913079	1	0.936018	0.835048	0.836644	0.913829	0.992074	0.835949	0.83632	0.83566	0.935971	0.83228	0.991859	0.83627
K.michiganensis	GCF_014217275	0.99279	0.832905	0.92238	0.93545	1	0.835169	0.83652	0.922072	0.936282	0.836098	0.836731	0.835661	0.98671	0.832395	0.936475	0.836704
K.pneumoniae	GCF_000735285	0.83662	0.848953	0.832214	0.834506	0.835512	1	0.990483	0.833116	0.839753	0.938296	0.938708	0.991029	0.837078	0.850181	0.838697	0.938702
K.pneumoniae	GCF_000364385	0.838285	0.850293	0.83561	0.836382	0.837557	0.990049	1	0.836933	0.839761	0.937702	0.93782	0.996424	0.83833	0.84993	0.84007	0.93784
K.oxytoca	GCF_001022295	0.921945	0.830315	0.99434	0.912905	0.922507	0.834469	0.83721	1	0.913905	0.833735	0.833886	0.836817	0.922354	0.830052	0.913987	0.833842
K.grimontii	GCF_004104525	0.936561	0.834982	0.913843	0.991155	0.936538	0.839585	0.839555	0.913536	1	0.838165	0.836956	0.840817	0.936389	0.83586	0.99697	0.83694
K.quasipneumoniae	GCF_000827665	0.836354	0.848399	0.83305	0.83605	0.836391	0.938515	0.93761	0.832914	0.837621	1	0.992634	0.93869	0.83815	0.848684	0.837148	0.992665
K.quasipneumoniae	GCF_001280925	0.837127	0.849579	0.833458	0.837115	0.838186	0.939096	0.938265	0.8345	0.838071	0.992963	1	0.939037	0.838708	0.849598	0.837786	0.999971
K.pneumoniae	GCF_000722485	0.836364	0.849186	0.832866	0.835048	0.835644	0.990667	0.997304	0.835147	0.839912	0.938213	0.937974	1	0.836172	0.849717	0.838625	0.938014
K.michiganensis	GCF_017639895	0.987231	0.833021	0.922132	0.935495	0.986704	0.836054	0.837005	0.921597	0.936285	0.837725	0.837142	0.835876	1	0.832651	0.936368	0.837131
K.aerogenes	GCF_000957275	0.832607	0.985735	0.829676	0.832096	0.83277	0.850499	0.849505	0.829857	0.83516	0.84849	0.848182	0.850964	0.832789	1	0.835594	0.848165
K.michiganensis	KMLRT2206	1	0.833236	0.922284	0.936326	0.993183	0.835891	0.83716	0.921719	0.936304	0.835677	0.836302	0.836318	0.987998	0.832003	0.937031	0.836269
K.grimontii	GCF_003261555	0.936226	0.834319	0.913529	0.989388	0.935897	0.838755	0.838351	0.913027	0.996362	0.836857	0.83588	0.839578	0.935647	0.835775	1	0.835858
K.quasipneumoniae	GCF_001278905	0.836759	0.848555	0.833767	0.83689	0.837952	0.939098	0.938224	0.834547	0.837647	0.992753	0.999947	0.938982	0.838409	0.848828	0.837445	1
