# Supplementary material for: Genome assembly of Klebsiella michiganensis based on metagenomic next-generation sequencing reveals its genomic characteristics in population genetics and molecular epidemiology
Source: Front Microbiol. 2025 Apr 24;16:1546594. doi: 10.3389/fmicb.2025.1546594 (PMC12058774; doi:10.3389/fmicb.2025.1546594)
Supplement: Supplementary Table 3 — Metadata of epidemiological and genomic features of all K. michiganensis strains used in this study. [file Table_3.xlsx]

## Sheet: Table S3
AssemblyID	Organism	Country	Collection date	Host	K_type	O_type	ST	gapA	infB	mdh	pgi	phoE	rpoB	tonB
KMLRT2206	Klebsiella michiganensis	China	2022	Homo sapiens	unknown	O1	452	3	8	16	21	107	19	99
GCF_000247835	Klebsiella michiganensis	-	-	Homo sapiens	unknown	O1	29	3	4	15	8	18	6	11
GCF_000783895	Klebsiella michiganensis	USA	2013	Homo sapiens	unknown	O2a	Novel	3	5	7	65	20	6	5
GCF_001028875	Klebsiella michiganensis	Germany	2013	Homo sapiens	unknown	O1	202	3	5	21	13	74	6	12
GCF_001028885	Klebsiella michiganensis	Germany	2013	Homo sapiens	unknown	O1	202	3	5	21	13	74	6	12
GCF_001030755	Klebsiella michiganensis	-	2014	Homo sapiens	K43	O2a	143	3	8	43	7	20	33	23
GCF_001052035	Klebsiella michiganensis	USA	-	Homo sapiens	K70	O1	Novel	~3	8	73	29	103	19	30
GCF_001052045	Klebsiella michiganensis	USA	-	Homo sapiens	K70	O1	Novel	~3	8	73	29	103	19	30
GCF_001052525	Klebsiella michiganensis	USA	-	Homo sapiens	unknown	O1	83	3	4	30	8	39	26	35
GCF_001052785	Klebsiella michiganensis	USA	-	Homo sapiens	K70	O1	Novel	~3	8	73	29	103	19	30
GCF_001053845	Klebsiella michiganensis	USA	-	Homo sapiens	K70	O1	Novel	~3	8	73	29	103	19	30
GCF_001053875	Klebsiella michiganensis	USA	-	Homo sapiens	unknown	O1	Novel	3	8	24	42	106	6	41
GCF_001054755	Klebsiella michiganensis	USA	-	Homo sapiens	unknown	O1	Novel	12	8	17	9	106	32	~41
GCF_001056405	Klebsiella michiganensis	USA	-	Homo sapiens	unknown	O1	Novel	12	8	17	9	106	32	~41
GCF_001056445	Klebsiella michiganensis	USA	-	Homo sapiens	unknown	unknown	41	3	9	8	9	20	15	8
GCF_001056765	Klebsiella michiganensis	USA	-	Homo sapiens	unknown	O1	92	3	4	15	8	18	6	37
GCF_001066805	Klebsiella michiganensis	USA	-	Homo sapiens	unknown	O2a	11	3	5	7	8	11	6	5
GCF_001077175	Klebsiella michiganensis	USA	-	Homo sapiens	unknown	O2a	11	3	5	7	8	11	6	5
GCF_001317245	Klebsiella michiganensis	South Africa	-	Homo sapiens	K29	unknown	170	3	8	17	42	40	6	23
GCF_001583485	Klebsiella michiganensis	USA	2014	Homo sapiens	unknown	unknown	-	-	14	22	21	25	17	21
GCF_001938605	Klebsiella michiganensis	USA	2017	Homo sapiens	K70	O1	317	3	8	22	9	20	33	23
GCF_001945455	Klebsiella michiganensis	USA	1997	Homo sapiens	unknown	unknown	50	3	8	8	7	10	6	7
GCF_002152315	Klebsiella michiganensis	USA	2015	Homo sapiens	unknown	O2a	143	3	8	43	7	20	33	23
GCF_002152325	Klebsiella michiganensis	USA	2015	Homo sapiens	unknown	unknown	Novel	3	50	15	22	~18	6	4
GCF_002216835	Klebsiella michiganensis	-	2017	Homo sapiens	unknown	O1	27	3	5	7	13	17	4	5
GCF_002265195	Klebsiella michiganensis	China	2014	Homo sapiens	unknown	O1	27	3	5	7	13	17	4	5
GCF_002852935	Klebsiella michiganensis	China	2016	Homo sapiens	unknown	O1	50	3	8	8	7	10	6	7
GCF_002853055	Klebsiella michiganensis	China	2016	Homo sapiens	unknown	O1	92	3	4	15	8	18	6	37
GCF_002887165	Klebsiella michiganensis	USA	-	Homo sapiens	unknown	O1	50	3	8	8	7	10	6	7
GCF_002887605	Klebsiella michiganensis	USA	-	Homo sapiens	unknown	O1	Novel	12	9	17	9	20	~17	29
GCF_003598595	Klebsiella michiganensis	Switzerland	2017	Homo sapiens	unknown	O1	27	3	5	7	13	17	4	5
GCF_004156315	Klebsiella michiganensis	Hungary	2010	Homo sapiens	unknown	O2a	52	8	8	16	21	20	19	12
GCF_008120085	Klebsiella michiganensis	United Kingdom	2019	Homo sapiens	unknown	O1	157	3	34	45	48	20	17	47
GCF_008120305	Klebsiella michiganensis	United Kingdom	2019	Homo sapiens	unknown	O2a	-	3	9	40	21	20	6	-
GCF_008121175	Klebsiella michiganensis	USA	2019	Homo sapiens	unknown	O1	366	3	8	17	21	51	6	23
GCF_008931605	Klebsiella michiganensis	Australia	2014	Homo sapiens	K43	O1	108	3	5	21	20	24	6	30
GCF_009825595	Klebsiella michiganensis	Senegal	2013	Homo sapiens	unknown	O1	Novel	~3	~25	~25	~8	20	~6	~61
GCF_009930855	Klebsiella michiganensis	China	2014	Homo sapiens	K41	unknown	383	3	4	75	4	25	3	28
GCF_010588125	Klebsiella michiganensis	USA	2016	Homo sapiens	unknown	unknown	Novel	3	~8	8	7	10	6	7
GCF_010590065	Klebsiella michiganensis	USA	2016	Homo sapiens	unknown	O1	Novel	3	5	21	58	108	6	20
GCF_010590245	Klebsiella michiganensis	USA	2015	Homo sapiens	K43	O1	43	3	5	21	20	11	6	20
GCF_010590505	Klebsiella michiganensis	USA	2015	Homo sapiens	unknown	O2ac	11	3	5	7	8	11	6	5
GCF_010590665	Klebsiella michiganensis	USA	2016	Homo sapiens	unknown	O2a	32	3	8	16	16	20	6	12
GCF_010592905	Klebsiella michiganensis	USA	2015	Homo sapiens	unknown	O1	103	3	5	34	13	17	4	5
GCF_010598605	Klebsiella michiganensis	USA	2016	Homo sapiens	unknown	unknown	50	3	8	8	7	10	6	7
GCF_013392155	Klebsiella michiganensis	Switzerland	2019	Homo sapiens	K70	O1	183	3	4	47	8	43	3	4
GCF_013821765	Klebsiella michiganensis	Spain	2020	Homo sapiens	K43	O1	Novel	3	8	24	33	20	6	20
GCF_014050515	Klebsiella michiganensis	United Kingdom	2022	Homo sapiens	unknown	unknown	138	3	8	24	46	53	32	48
GCF_014050535	Klebsiella michiganensis	United Kingdom	2022	Homo sapiens	unknown	unknown	138	3	8	24	46	53	32	48
GCF_014050555	Klebsiella michiganensis	United Kingdom	2022	Homo sapiens	unknown	unknown	138	3	8	24	46	53	32	48
GCF_014856135	Klebsiella michiganensis	Germany	2014	Homo sapiens	unknown	O1	29	3	4	15	8	18	6	11
GCF_014856145	Klebsiella michiganensis	Germany	2014	Homo sapiens	unknown	O1	29	3	4	15	8	18	6	11
GCF_014856365	Klebsiella michiganensis	Germany	2014	Homo sapiens	K26	O1	Novel	3	15	15	8	25	3	35
GCF_014856385	Klebsiella michiganensis	Germany	2020	Homo sapiens	K26	O1	Novel	3	15	15	8	25	3	35
GCF_014856435	Klebsiella michiganensis	Germany	2014	Homo sapiens	K26	O1	Novel	3	15	15	8	25	3	35
GCF_015139575	Klebsiella michiganensis	Japan	2018	Homo sapiens	unknown	O1	Novel	12	29	17	9	20	~19	~46
GCF_015550995	Klebsiella michiganensis	USA	2015	Homo sapiens	unknown	O2a	Novel	~28	5	60	13	24	33	12
GCF_015679365	Klebsiella michiganensis	Switzerland	2017	Homo sapiens	unknown	unknown	303	12	29	20	21	40	32	46
GCF_015721205	Klebsiella michiganensis	USA	2019	Homo sapiens	unknown	O2a	11	3	5	7	8	11	6	5
GCF_015721285	Klebsiella michiganensis	USA	2018	Homo sapiens	unknown	O2a	32	3	8	16	16	20	6	12
GCF_015721325	Klebsiella michiganensis	USA	2018	Homo sapiens	unknown	O2a	32	3	8	16	16	20	6	12
GCF_015721335	Klebsiella michiganensis	USA	2018	Homo sapiens	K43	O1	43	3	5	21	20	11	6	20
GCF_015721425	Klebsiella michiganensis	USA	2018	Homo sapiens	unknown	O1	85	3	5	21	13	24	6	19
GCF_015721435	Klebsiella michiganensis	USA	2018	Homo sapiens	unknown	O1	239	3	29	32	29	10	6	67
GCF_015721445	Klebsiella michiganensis	USA	2018	Homo sapiens	unknown	O2a	239	3	29	32	29	10	6	67
GCF_015721485	Klebsiella michiganensis	USA	2018	Homo sapiens	unknown	O1	205	12	9	17	9	20	17	29
GCF_015721585	Klebsiella michiganensis	USA	2017	Homo sapiens	unknown	unknown	84	3	8	17	21	40	17	29
GCF_015721605	Klebsiella michiganensis	USA	2017	Homo sapiens	unknown	O1	27	3	5	7	13	17	4	5
GCF_015721625	Klebsiella michiganensis	USA	2017	Homo sapiens	unknown	unknown	84	3	8	17	21	40	17	29
GCF_015721645	Klebsiella michiganensis	USA	2017	Homo sapiens	unknown	unknown	84	3	8	17	21	40	17	29
GCF_015721745	Klebsiella michiganensis	USA	2017	Homo sapiens	unknown	O1	85	3	5	21	13	24	6	19
GCF_015999385	Klebsiella michiganensis	China	2020	Homo sapiens	K74	O1	330	3	4	15	4	33	45	4
GCF_016618215	Klebsiella michiganensis	Switzerland	2018	Homo sapiens	unknown	O1	342	3	5	40	64	24	6	82
GCF_016652915	Klebsiella michiganensis	Australia	2021	Homo sapiens	K70	O1	306	3	8	22	52	20	33	23
GCF_016652925	Klebsiella michiganensis	Australia	2021	Homo sapiens	K29	O1	Novel	3	8	17	42	106	6	23
GCF_016652965	Klebsiella michiganensis	Australia	2021	Homo sapiens	unknown	O1	27	3	5	7	13	17	4	5
GCF_016652995	Klebsiella michiganensis	Australia	2021	Homo sapiens	unknown	O1	27	3	5	7	13	17	4	5
GCF_016653015	Klebsiella michiganensis	Australia	2021	Homo sapiens	unknown	O2a	213	3	5	21	13	24	6	61
GCF_016653035	Klebsiella michiganensis	Australia	2021	Homo sapiens	unknown	O1	40	3	8	20	7	23	14	18
GCF_016653085	Klebsiella michiganensis	Australia	2021	Homo sapiens	unknown	unknown	196	3	14	50	21	25	17	21
GCF_016679895	Klebsiella michiganensis	Australia	2018	Homo sapiens	K70	O1	306	3	8	22	52	20	33	23
GCF_016734915	Klebsiella michiganensis	Australia	2019	Homo sapiens	unknown	O1	64	10	8	27	29	32	6	27
GCF_016734965	Klebsiella michiganensis	Australia	2019	Homo sapiens	unknown	O1	135	3	8	17	45	20	6	48
GCF_016734985	Klebsiella michiganensis	Australia	2019	Homo sapiens	K43	unknown	231	3	9	20	21	25	17	56
GCF_016735005	Klebsiella michiganensis	Australia	2019	Homo sapiens	K43	O1	43	3	5	21	20	11	6	20
GCF_016905825	Klebsiella michiganensis	Czech Republic	2018	Homo sapiens	unknown	O1	144	3	5	21	20	24	6	20
GCF_017114595	Klebsiella michiganensis	Czech Republic	2018	Homo sapiens	unknown	O1	84	3	8	17	21	40	17	29
GCF_017348855	Klebsiella michiganensis	China	2019	Homo sapiens	unknown	O1	370	3	29	74	21	20	31	12
GCF_017639895	Klebsiella michiganensis	China	2013	Homo sapiens	K43	O1	43	3	5	21	20	11	6	20
GCF_017810085	Klebsiella michiganensis	Lebanon	2021	Homo sapiens	unknown	O1	27	3	5	7	13	17	4	5
GCF_018092585	Klebsiella michiganensis	Germany	2020	Homo sapiens	unknown	unknown	226	3	9	55	21	81	6	64
GCF_018092635	Klebsiella michiganensis	Germany	2020	Homo sapiens	unknown	unknown	226	3	9	55	21	81	6	64
GCF_018138395	Klebsiella michiganensis	Russia	2019	Homo sapiens	unknown	O1	349	3	50	15	8	41	22	4
GCF_018138465	Klebsiella michiganensis	Russia	2019	Homo sapiens	unknown	O1	82	14	24	15	8	18	6	4
GCF_018138485	Klebsiella michiganensis	Russia	2019	Homo sapiens	unknown	O1	349	3	50	15	8	41	22	4
GCF_018422065	Klebsiella michiganensis	Germany	2019	Homo sapiens	unknown	O1	180	3	8	22	42	20	33	23
GCF_018422165	Klebsiella michiganensis	Germany	2019	Homo sapiens	unknown	unknown	-	3	8	24	46	53	32	-
GCF_018438865	Klebsiella michiganensis	Germany	2018	Homo sapiens	unknown	O1	205	12	9	17	9	20	17	29
GCF_018439305	Klebsiella michiganensis	Germany	2017	Homo sapiens	unknown	O2a	213	3	5	21	13	24	6	61
GCF_018439315	Klebsiella michiganensis	Germany	2017	Homo sapiens	unknown	O2a	213	3	5	21	13	24	6	61
GCF_018439335	Klebsiella michiganensis	Germany	2017	Homo sapiens	unknown	O2a	213	3	5	21	13	24	6	61
GCF_018439355	Klebsiella michiganensis	Germany	2017	Homo sapiens	unknown	O1	205	12	9	17	9	20	17	29
GCF_018439405	Klebsiella michiganensis	Germany	2017	Homo sapiens	unknown	O1	205	12	9	17	9	20	17	29
GCF_018440985	Klebsiella michiganensis	Germany	2019	Homo sapiens	unknown	O1	98	3	27	32	21	44	19	38
GCF_018442305	Klebsiella michiganensis	Germany	2018	Homo sapiens	unknown	O2a	213	3	5	21	13	24	6	61
GCF_018442325	Klebsiella michiganensis	Germany	2018	Homo sapiens	unknown	O2a	213	3	5	21	13	24	6	61
GCF_018443125	Klebsiella michiganensis	Germany	2017	Homo sapiens	unknown	O2a	213	3	5	21	13	24	6	61
GCF_018604105	Klebsiella michiganensis	China	2021	Homo sapiens	unknown	O1	109	3	9	8	9	20	6	8
GCF_019050695	Klebsiella michiganensis	China	2019	Homo sapiens	K43	O1	108	3	5	21	20	24	6	30
GCF_019460145	Klebsiella michiganensis	China	2021	Homo sapiens	unknown	O1	91	3	4	15	8	12	3	35
GCF_019730455	Klebsiella michiganensis	China	2020	Homo sapiens	unknown	O1	35	3	8	17	7	20	6	13
GCF_019730515	Klebsiella michiganensis	China	2020	Homo sapiens	unknown	O1	35	3	8	17	7	20	6	13
GCF_019730535	Klebsiella michiganensis	China	2020	Homo sapiens	unknown	O1	35	3	8	17	7	20	6	13
GCF_019730985	Klebsiella michiganensis	China	2020	Homo sapiens	unknown	O1	157	3	34	45	48	20	17	47
GCF_019731925	Klebsiella michiganensis	Germany	2021	Homo sapiens	unknown	O1	-	~3	8	17	52	20	6	-
GCF_019803065	Klebsiella michiganensis	Canada	2017	Homo sapiens	unknown	O1	Novel	3	5	7	13	24	6	5
GCF_020115135	Klebsiella michiganensis	Switzerland	2016	Homo sapiens	unknown	unknown	Novel	12	~5	17	21	20	19	7
GCF_020116315	Klebsiella michiganensis	Switzerland	2016	Homo sapiens	unknown	unknown	128	3	31	40	21	20	6	46
GCF_020116815	Klebsiella michiganensis	Switzerland	2017	Homo sapiens	unknown	unknown	50	3	8	8	7	10	6	7
GCF_020116935	Klebsiella michiganensis	Switzerland	2017	Homo sapiens	unknown	unknown	Novel	3	8	24	46	106	6	23
GCF_020116955	Klebsiella michiganensis	Switzerland	2017	Homo sapiens	unknown	unknown	Novel	3	8	24	21	20	6	88
GCF_020116995	Klebsiella michiganensis	Switzerland	2017	Homo sapiens	unknown	O1	43	3	5	21	20	11	6	20
GCF_020117015	Klebsiella michiganensis	Switzerland	2016	Homo sapiens	unknown	O1	253	3	5	21	58	11	6	12
GCF_020117075	Klebsiella michiganensis	Switzerland	2017	Homo sapiens	unknown	O1	Novel	12	29	55	12	20	31	~46
GCF_020117095	Klebsiella michiganensis	Switzerland	2017	Homo sapiens	unknown	O1	40	3	8	20	7	23	14	18
GCF_020117465	Klebsiella michiganensis	Switzerland	2017	Homo sapiens	unknown	O2a	Novel	3	29	8	42	108	6	45
GCF_020117475	Klebsiella michiganensis	Switzerland	2017	Homo sapiens	unknown	O1	29	3	4	15	8	18	6	11
GCF_020117515	Klebsiella michiganensis	Switzerland	2017	Homo sapiens	unknown	O1	Novel	3	9	17	9	~51	6	27
GCF_020117535	Klebsiella michiganensis	Switzerland	2017	Homo sapiens	unknown	unknown	Novel	12	9	17	9	20	6	30
GCF_020117545	Klebsiella michiganensis	Switzerland	2017	Homo sapiens	unknown	O1	-	3	-	7	~20	23	~16	18
GCF_020117595	Klebsiella michiganensis	Switzerland	2017	Homo sapiens	unknown	O1	85	3	5	21	13	24	6	19
GCF_020117655	Klebsiella michiganensis	Switzerland	2017	Homo sapiens	unknown	O1	Novel	12	8	20	21	10	32	53?
GCF_020117665	Klebsiella michiganensis	Switzerland	2017	Homo sapiens	unknown	O1	85	3	5	21	13	24	6	19
GCF_020117695	Klebsiella michiganensis	Switzerland	2017	Homo sapiens	unknown	O1	13	3	9	8	9	13	6	8
GCF_020117715	Klebsiella michiganensis	Switzerland	2017	Homo sapiens	unknown	O1	85	3	5	21	13	24	6	19
GCF_020117735	Klebsiella michiganensis	Switzerland	2017	Homo sapiens	unknown	O2a	213	3	5	21	13	24	6	61
GCF_020117775	Klebsiella michiganensis	Switzerland	2017	Homo sapiens	unknown	O1	43	3	5	21	20	11	6	20
GCF_020117795	Klebsiella michiganensis	Switzerland	2017	Homo sapiens	unknown	O1	29	3	4	15	8	18	6	11
GCF_020117815	Klebsiella michiganensis	Switzerland	2017	Homo sapiens	unknown	unknown	Novel	3	5	40	58	24	4	12
GCF_020117865	Klebsiella michiganensis	Switzerland	2017	Homo sapiens	unknown	O1	27	3	5	7	13	17	4	5
GCF_020117955	Klebsiella michiganensis	Switzerland	2017	Homo sapiens	unknown	unknown	44	3	14	22	21	25	17	21
GCF_020118035	Klebsiella michiganensis	Switzerland	2017	Homo sapiens	unknown	O2a	146	3	5	44	13	24	6	50
GCF_020118055	Klebsiella michiganensis	Switzerland	2016	Homo sapiens	unknown	O1	231	3	9	20	21	25	17	56
GCF_020118235	Klebsiella michiganensis	Switzerland	2017	Homo sapiens	unknown	unknown	231	3	9	20	21	25	17	56
GCF_020118365	Klebsiella michiganensis	Switzerland	2017	Homo sapiens	unknown	O1	231	3	9	20	21	25	17	56
GCF_020118415	Klebsiella michiganensis	Switzerland	2017	Homo sapiens	unknown	O1	151	3	5	21	13	20	6	12
GCF_020118455	Klebsiella michiganensis	Switzerland	2017	Homo sapiens	unknown	O1	85	3	5	21	13	24	6	19
GCF_020118495	Klebsiella michiganensis	Switzerland	2017	Homo sapiens	unknown	O1	135	3	8	17	45	20	6	48
GCF_020118555	Klebsiella michiganensis	Switzerland	2017	Homo sapiens	unknown	unknown	11	3	5	7	8	11	6	5
GCF_020118655	Klebsiella michiganensis	Switzerland	2017	Homo sapiens	unknown	O2a	11	3	5	7	8	11	6	5
GCF_020118665	Klebsiella michiganensis	Switzerland	2017	Homo sapiens	unknown	O1	43	3	5	21	20	11	6	20
GCF_020118815	Klebsiella michiganensis	Switzerland	2017	Homo sapiens	unknown	O1	410	3	55	28	21	103	48	30
GCF_020118915	Klebsiella michiganensis	Switzerland	2017	Homo sapiens	unknown	O1	40	3	8	20	7	23	14	18
GCF_020118955	Klebsiella michiganensis	Switzerland	2017	Homo sapiens	unknown	unknown	226	3	9	55	21	81	6	64
GCF_020119055	Klebsiella michiganensis	Switzerland	2017	Homo sapiens	unknown	O1	27	3	5	7	13	17	4	5
GCF_020120175	Klebsiella michiganensis	Switzerland	2017	Homo sapiens	unknown	O1	43	3	5	21	20	11	6	20
GCF_020120585	Klebsiella michiganensis	Switzerland	2017	Homo sapiens	unknown	O1	85	3	5	21	13	24	6	19
GCF_020120895	Klebsiella michiganensis	Switzerland	2017	Homo sapiens	unknown	unknown	44	3	14	22	21	25	17	21
GCF_020121095	Klebsiella michiganensis	Switzerland	2017	Homo sapiens	unknown	O1	27	3	5	7	13	17	4	5
GCF_020121115	Klebsiella michiganensis	Switzerland	2017	Homo sapiens	unknown	unknown	85	3	5	21	13	24	6	19
GCF_020121285	Klebsiella michiganensis	Switzerland	2017	Homo sapiens	unknown	unknown	303	12	29	20	21	40	32	46
GCF_020121435	Klebsiella michiganensis	Switzerland	2017	Homo sapiens	unknown	unknown	353	3	14	22	21	20	17	21
GCF_020479805	Klebsiella michiganensis	China	2014	Homo sapiens	unknown	unknown	50	3	8	8	7	10	6	7
GCF_021228695	Klebsiella michiganensis	Australia	2018	Homo sapiens	unknown	O1	309	3	5	21	13	24	33	20
GCF_021228755	Klebsiella michiganensis	Australia	2018	Homo sapiens	K43	O1	231	3	9	20	21	25	17	56
GCF_021228855	Klebsiella michiganensis	China	2017	Homo sapiens	unknown	O1	27	3	5	7	13	17	4	5
GCF_021228995	Klebsiella michiganensis	China	2021	Human body fluids	unknown	unknown	196	3	14	50	21	25	17	21
GCF_021391575	Klebsiella michiganensis	China	2012	Homo sapiens	unknown	O1	91	3	4	15	8	12	3	35
GCF_021460075	Klebsiella michiganensis	Pakistan	2016	Homo sapiens	K74	O1	180	3	8	22	42	20	33	23
GCF_022163245	Klebsiella michiganensis	Japan	2018	Homo sapiens	unknown	O2a	265	28	5	60	13	24	33	12
GCF_022343245	Klebsiella michiganensis	China	2021	Homo sapiens	unknown	O2a	27	3	5	7	13	17	4	5
GCF_022343265	Klebsiella michiganensis	China	2021	Homo sapiens	unknown	O2a	27	3	5	7	13	17	4	5
GCF_022501085	Klebsiella michiganensis	China	2019	Homo sapiens	unknown	O2a	11	3	5	7	8	11	6	5
GCF_022501105	Klebsiella michiganensis	China	2019	Homo sapiens	unknown	O1	194	12	29	20	51	40	6	46
GCF_022551435	Klebsiella michiganensis	USA	2017	Homo sapiens	unknown	O2a	Novel	3	5	7	61	24	6	78
GCF_022569835	Klebsiella michiganensis	China	2019	Homo sapiens	unknown	O1	85	3	5	21	13	24	6	19
GCF_022859475	Klebsiella michiganensis	China	2019	Homo sapiens	K70	unknown	194	12	29	20	51	40	6	46
GCF_023093655	Klebsiella michiganensis	Brazil	2019	Homo sapiens	unknown	O1	50	3	8	8	7	10	6	7
GCF_023093835	Klebsiella michiganensis	China	2017	Homo sapiens	K74	O1	330	3	4	15	4	33	45	4
GCF_023502385	Klebsiella michiganensis	China	2018	Homo sapiens	unknown	O1	-	-	8	20	7	-	14	18
GCF_024499915	Klebsiella michiganensis	Israel	2022	Homo sapiens	unknown	O2a	202	3	5	21	13	74	6	12
GCF_024542875	Klebsiella michiganensis	China	2017	Homo sapiens	unknown	O1	29	3	4	15	8	18	6	11
GCF_024917295	Klebsiella michiganensis	USA	2019	Homo sapiens	unknown	O2a	11	3	5	7	8	11	6	5
GCF_026008455	Klebsiella michiganensis	Japan	2016	Homo sapiens	unknown	O1	194	12	29	20	51	40	6	46
GCF_026008475	Klebsiella michiganensis	Japan	2015	Homo sapiens	unknown	unknown	85	3	5	21	13	24	6	19
GCF_026223635	Klebsiella michiganensis	Brazil	2021	Homo sapiens	K26	unknown	Novel	3	50	15	22	18	6	4
GCF_026224015	Klebsiella michiganensis	Switzerland	2019	Homo sapiens	K70	O1	183	3	4	47	8	43	3	4
GCF_026224055	Klebsiella michiganensis	Switzerland	2022	Homo sapiens	unknown	O1	35	3	8	17	7	20	6	13
GCF_026224085	Klebsiella michiganensis	Switzerland	2019	Homo sapiens	K43	O1	43	3	5	21	20	11	6	20
GCF_026224385	Klebsiella michiganensis	Switzerland	2020	Homo sapiens	unknown	O1	354	3	5	21	58	24	6	20
GCF_026224395	Klebsiella michiganensis	Switzerland	2019	Homo sapiens	K70	O2a	409	3	8	17	29	108	6	25
GCF_026224435	Klebsiella michiganensis	Switzerland	2021	Homo sapiens	unknown	O1	52	8	8	16	21	20	19	12
GCF_026224455	Klebsiella michiganensis	Switzerland	2021	Homo sapiens	unknown	O1	410	3	55	28	21	103	48	30
GCF_026224605	Klebsiella michiganensis	Switzerland	2014	Homo sapiens	unknown	unknown	50	3	8	8	7	10	6	7
GCF_026224675	Klebsiella michiganensis	Switzerland	2014	Homo sapiens	unknown	unknown	50	3	8	8	7	10	6	7
GCF_026224695	Klebsiella michiganensis	Switzerland	2020	Homo sapiens	unknown	O1	398	3	9	25	7	20	6	54
GCF_026224715	Klebsiella michiganensis	Switzerland	2020	Homo sapiens	unknown	O1	210	3	4	51	8	77	6	59
GCF_026274395	Klebsiella michiganensis	USA	2022	Homo sapiens	unknown	O1	Novel	3	4	15	8	18	~3	4
GCF_026619535	Klebsiella michiganensis	China	2016	Homo sapiens	unknown	O1	108	3	5	21	20	24	6	30
GCF_026627605	Klebsiella michiganensis	USA	2022	Homo sapiens	unknown	unknown	308	3	14	8	21	25	17	21
GCF_026627765	Klebsiella michiganensis	USA	2020	Homo sapiens	unknown	O1	Novel	3	4	15	8	18	~3	4
GCF_026703225	Klebsiella michiganensis	USA	2017	Homo sapiens	unknown	O1	Novel	3	4	15	8	~41	3	4
GCF_026967695	Klebsiella michiganensis	USA	2022	Homo sapiens	unknown	unknown	138	3	8	24	46	53	32	48
GCF_027577885	Klebsiella michiganensis	USA	2022	Homo sapiens	unknown	O1	Novel	3	8	~8	7	10	6	7
GCF_027584345	Klebsiella michiganensis	USA	2015	Homo sapiens	unknown	unknown	138	3	8	24	46	53	32	48
GCF_027584475	Klebsiella michiganensis	USA	2015	Homo sapiens	unknown	O2a	363	3	40	7	54	75	4	20
GCF_027595545	Klebsiella michiganensis	USA	2017	Homo sapiens	unknown	unknown	50	3	8	8	7	10	6	7
